# Supplementary material for: Complete mitochondrial genome sequences of Brassica rapa (Chinese cabbage and mizuna), and intraspecific differentiation of cytoplasm in B. rapa and Brassica juncea
Source: PubMed Central journal article supplement — Breed Sci. 2017 Jul 28;67(4):357–62. doi: 10.1270/jsbbs.17023 (PMC5654463; doi:10.1270/jsbbs.17023), 2017-07-28
Supplement: 67_17023_1.pdf [file 67_17023_1.pdf]

Supplemental Table1. Insertions and deletions between the two reports of the mitochondrial genome of *B. rapa*

| Position in the mt genome of<br>'Oushou hakusai' <sup>a</sup> | Sequences <sup>b</sup>     |              |
|---------------------------------------------------------------|----------------------------|--------------|
|                                                               | Chang <i>et al.</i> (2011) | This article |
| 527                                                           | (A) 6                      | (A) 7        |
| 13661                                                         | (T) 6                      | (T) 7        |
| 15523                                                         | (A) 4                      | (A) 3        |
| 15563                                                         | (C) 5                      | (C) 6        |
| 21583                                                         | (A) 4                      | (A) 5        |
| 31369                                                         | (T) 6                      | (T) 7        |
| 35325                                                         | (A) 6                      | (A) 7        |
| 36449                                                         | (A) 7                      | (A) 8        |
| 53533                                                         | (A) 4                      | (A) 5        |
| 58197, 58198                                                  | (A) 9                      | (A) 11       |
| 66954                                                         | (A) 6                      | (A) 7        |
| 81473                                                         | (A) 8                      | (A) 9        |
| 81477                                                         | (A) 2                      | (A) 3        |
| 91444                                                         | (A) 4                      | (A) 5        |
| 99119                                                         | (T) 4                      | (T) 5        |
| 119185                                                        | (T) 6                      | (T) 7        |
| 119224                                                        | (T) 6                      | (T) 7        |
| 126095                                                        | (A) 5                      | (A) 6        |
| 129733                                                        | (T) 6                      | (T) 7        |
| 129837                                                        | (A) 5                      | (A) 6        |
| 144081                                                        | (A) 9                      | (A) 10       |
| 147990                                                        | (T) 4                      | (T) 5        |
| 159206                                                        | (G) 4                      | (G) 5        |
| 164421                                                        | (A) 6                      | (A) 7        |
| 165743                                                        | (A) 8                      | (A) 9        |
| 168186                                                        | (T) 8                      | (T) 9        |
| 168331                                                        | (T) 8                      | (T) 9        |
| 171361                                                        | (A) 5                      | (A) 6        |
| 192415                                                        | (T) 6                      | (T) 7        |

<sup>a</sup> The position starts from *cox2-2exon2* as number 1 and proceeds clockwise.

<sup>b</sup> Numerals following the parentheses show the numbers of mononucleotide.
